# Supplementary material for: De Novo Sporophyte Transcriptome Assembly and Functional Annotation in the Endangered Fern Species Vandenboschia speciosa (Willd.) G. Kunkel
Source: MDPI journal article supplement (doi:10.3390/genes12071017), 2021-06-30
Supplement: s1 [file s1]

**Table S6. Upper part.** Number of genes of *V. speciosa* that have homologous genes in each of the other seven species analyzed. **Lower part.** Number of genes of each species having homologous genes in *V. speciosa*.

| Species                            | One-to-one* | One-to-many* | Many-to-one* | Many-to-many* | Total        |
|------------------------------------|-------------|--------------|--------------|---------------|--------------|
| <i>Arabidopsis thaliana</i>        | 1539        | 2568         | 3009         | 6716          | <b>13832</b> |
| <i>Azolla filiculoides</i>         | 4139        | 1387         | 6536         | 3046          | <b>15108</b> |
| <i>Physcomitrella patens</i>       | 1886        | 2152         | 3842         | 7070          | <b>14950</b> |
| <i>Salvinia cucullata</i>          | 4370        | 1140         | 7008         | 2669          | <b>15187</b> |
| <i>Sellaginella moellendorffii</i> | 3254        | 865          | 7244         | 2926          | <b>14289</b> |
| <i>Ceratodon purpureus</i>         | 2184        | 1812         | 5101         | 5767          | <b>14864</b> |
| <i>Ceratopteris richardii</i>      | 2890        | 3518         | 4467         | 6259          | <b>17134</b> |

|               | <i>A. thaliana</i> | <i>A. filiculoides</i> | <i>P. patens</i> | <i>S. cucullata</i> | <i>S. moellendorffii</i> | <i>C. purpureus</i> | <i>C. richardii</i> |
|---------------|--------------------|------------------------|------------------|---------------------|--------------------------|---------------------|---------------------|
| One-to-one*   | 1539               | 4139                   | 1886             | 4370                | 3254                     | 2184                | 2890                |
| One-to-many*  | 1078               | 2549                   | 1384             | 2711                | 2594                     | 1734                | 1732                |
| Many-to-one*  | 9714               | 3500                   | 6490             | 2780                | 2420                     | 6258                | 9778                |
| Many-to-many* | 9738               | 2786                   | 7641             | 2343                | 2545                     | 6803                | 6737                |
| <b>Total</b>  | <b>22069</b>       | <b>12974</b>           | <b>17401</b>     | <b>12204</b>        | <b>10813</b>             | <b>16979</b>        | <b>21137</b>        |

\*One-to-one: One gene in species A is homologous to other gene in species B

One-to-many: One gene in species A is homologous to several paralogous genes in species B

Many-to-one: Several paralogous genes in species A are homologous to just one gene in species B

Many-to-many: Several paralogous genes in species A are homologous to several paralogous genes in species B
