# Supplementary material for: De Novo Sporophyte Transcriptome Assembly and Functional Annotation in the Endangered Fern Species Vandenboschia speciosa (Willd.) G. Kunkel
Source: MDPI journal article supplement (doi:10.3390/genes12071017), 2021-06-30
Supplement: s1 [file s1]

**Table S5.** Overall statistics of the Orthofinder analysis for eight land plant species

| Statistic                                              | Value  |
|--------------------------------------------------------|--------|
| Number of species                                      | 8      |
| Number of proteins                                     | 263674 |
| Number of proteins in orthogroups                      | 217519 |
| Number of unassigned proteins                          | 46155  |
| Percentage of proteins in orthogroups                  | 82.5   |
| Percentage of unassigned proteins                      | 17.5   |
| Number of orthogroups                                  | 26875  |
| Number of species-specific orthogroups                 | 12163  |
| Number of proteins in species-specific orthogroups     | 47903  |
| Percentage of proteins in species-specific orthogroups | 18.2   |
| Mean orthogroup size                                   | 8.1    |
| Median orthogroup size                                 | 4.0    |
| Number of orthogroups with all species present         | 5102   |
| Number of single-copy orthogroups                      | 101    |
